# Supplementary material for: Exploring Immunohistochemistry in Fish: Assessment of Antibody Reactivity by Western Immunoblotting
Source: MDPI journal article supplement (doi:10.3390/ani13182934), 2023-09-15
Supplement: s1 [file s1]

### Supplementary File with protein alignments.

- A. Percent identity matrices for vimentin, S100-A1, glial fibrillary acidic protein (GFAP), desmin.
- B. CLUSTAL O(1.2.4) multiple sequence alignment for vimentin.
- C. CLUSTAL O(1.2.4) multiple sequence alignment for S100 A9.
- D. CLUSTAL O(1.2.4) multiple sequence alignment for S100 A9.
- E. CLUSTAL O(1.2.4) multiple sequence alignment for desmin.

A. Percent identity matrices with the Uniprot Entry of the immunogens provided by the manufacturer.

#### Vimentin Percent Identity Matrix - created by Clustal2.1

|                                   |        |        |        |        |        |
|-----------------------------------|--------|--------|--------|--------|--------|
| 1: sp P48674 VIME_ONCMY           | 100.00 | 74.34  | 76.33  | 75.06  | 76.40  |
| 2: sp P02543 VIME_PIG             | 74.34  | 100.00 | 75.29  | 71.68  | 76.40  |
| 3: sp P48671 VIM1_CARAU           | 76.33  | 75.29  | 100.00 | 80.47  | 74.32  |
| 4: tr A0A671V9L3 A0A671V9L3_SPAAU | 75.06  | 71.68  | 80.47  | 100.00 | 95.68  |
| 5: tr A0A411KAS9 A0A411KAS9_DICLA | 76.40  | 76.40  | 74.32  | 95.68  | 100.00 |

#### S100 Percent Identity Matrix - created by Clustal2.1

|                                   |        |        |        |        |        |
|-----------------------------------|--------|--------|--------|--------|--------|
| 1: tr A0A6P6R5E7 A0A6P6R5E7_CARAU | 100.00 | 28.26  | 23.91  | 33.33  | 25.27  |
| 2: tr A0A671W834 A0A671W834_SPAAU | 28.26  | 100.00 | 49.49  | 45.74  | 46.94  |
| 3: tr C1BH93 C1BH93_ONCMY         | 23.91  | 49.49  | 100.00 | 52.13  | 52.04  |
| 4: sp P02639 S10A1_BOVIN          | 33.33  | 45.74  | 52.13  | 100.00 | 62.77  |
| 5: tr A0A8C4I043 A0A8C4I043_DICLA | 25.27  | 46.94  | 52.04  | 62.77  | 100.00 |

#### GFAP Percent Identity Matrix - created by Clustal2.1

|                                   |        |        |        |        |        |
|-----------------------------------|--------|--------|--------|--------|--------|
| 1: tr A0A671WZT8 A0A671WZT8_SPAAU | 100.00 | 33.10  | 32.48  | 31.49  | 35.26  |
| 2: sp Q28115 GFAP_BOVIN           | 33.10  | 100.00 | 64.37  | 61.68  | 72.05  |
| 3: tr A0A8C7NQ31 A0A8C7NQ31_ONCMY | 32.48  | 64.37  | 100.00 | 76.57  | 80.39  |
| 4: tr A0A8P4G1A2 A0A8P4G1A2_DICLA | 31.49  | 61.68  | 76.57  | 100.00 | 82.19  |
| 5: sp P48677 GFAP_CARAU           | 35.26  | 72.05  | 80.39  | 82.19  | 100.00 |

#### Desmin Percent Identity Matrix - created by Clustal2.1

|                                   |        |        |        |        |        |
|-----------------------------------|--------|--------|--------|--------|--------|
| 1: tr A0A6P6PJ00 A0A6P6PJ00_CARAU | 100.00 | 37.18  | 37.66  | 39.75  | 37.19  |
| 2: sp P17661 DESM_HUMAN           | 37.18  | 100.00 | 74.16  | 71.95  | 72.47  |
| 3: tr A0A8C4I534 A0A8C4I534_DICLA | 37.66  | 74.16  | 100.00 | 77.96  | 78.24  |
| 4: tr Q8UWF1 Q8UWF1_ONCMY         | 39.75  | 71.95  | 77.96  | 100.00 | 82.18  |
| 5: tr A0A2R2YUL3 A0A2R2YUL3_SPAAU | 37.19  | 72.47  | 78.24  | 82.18  | 100.00 |

B. CLUSTAL O(1.2.4) multiple sequence alignment for vimentin.

|                                |                                                                     |     |
|--------------------------------|---------------------------------------------------------------------|-----|
| sp P48674 VIME_ONCMY           | MNRTTSRQTTSSSSYKRMFGGEGRPVSGMARSTLSSRQYSSPVR-----SSRMS              | 49  |
| sp P02543 VIME_PIG             | ----MSTRIVSSSSYRRMFGGPGTASR---PSSRSYVTTSTRTYSLGSALRPSTSRSL          | 52  |
| sp P48671 VIM1_CARAU           | -----MSHRATPSSSYKRMFGGERSAR---SSYTSRQFSIPVR-----SSRAT               | 0   |
| tr A0A671V9L3 A0A671V9L3_SPAAU | -----MSHRATPSSSYKRMFGGERSAR---SSYTSRQFSIPVR-----SSRAT               | 41  |
| tr A0A411KAS9 A0A411KAS9_DICLA | -----MSHRATPSSSYKRMFGGERSAR---SSYTSRQFSIPVR-----SSRAT               | 0   |
| sp P48674 VIME_ONCMY           | YVSAPPSIYASKN--VRLRSSAPMPRLSSDVTDFALSDAINSEFKANRTNEKAEMQHLN         | 107 |
| sp P02543 VIME_PIG             | YT-SSPGGVYATRSSAVRLRSSVPGVRLQLQDAVDFSLADAINTEFKNTRTNEKVELQELN       | 111 |
| sp P48671 VIM1_CARAU           | -----YVSAPPSIYASKN--VRLRSSAPMPRLSSDVTDFALSDAINSEFKANRTNEKAEMQHLN    | 0   |
| tr A0A671V9L3 A0A671V9L3_SPAAU | YGVSLAPTIVYAAKT--QRLRSTAAMPRLASENLDFSLSDAINSEFMTNRTNEKVQMQLSLN      | 99  |
| tr A0A411KAS9 A0A411KAS9_DICLA | -----YGVSLAPTIVYAAKT--QRLRSTAAMPRLASENLDFSLSDAINSEFMTNRTNEKVQMQLSLN | 0   |
| sp P48674 VIME_ONCMY           | DRFASYIDKVRFLQEQNKILLAELEQLKGKGASRIGDLYEDEMRLRRQVDQLTNEKAHV         | 167 |
| sp P02543 VIME_PIG             | DRFANYIDKVRFLQEQNKILLAELEQLKGKGASRIGDLYEDEMRLRRQVDQLTNDKARV         | 171 |
| sp P48671 VIM1_CARAU           | -----DRFASYIDKVRFLQEQNKILLAELEQLKGKGASRIGDLYEDEMRLRRQVDQLTNEKAHV    | 0   |
| tr A0A671V9L3 A0A671V9L3_SPAAU | DRFASYIEKVRFLQEQNKILLAELEQLKGKGASRIGDLYEDEMRLRRQVDQLTNEKARV         | 159 |
| tr A0A411KAS9 A0A411KAS9_DICLA | -----DRFASYIEKVRFLQEQNKILLAELEQLKGKGASRIGDLYEDEMRLRRQVDQLTNEKARV    | 0   |
| sp P48674 VIME_ONCMY           | EVDRDNMGEDIERLREKLQDEMIQKEEAHNLQSFQDQVDNASLARLDLERKVESIQEEI         | 227 |
| sp P02543 VIME_PIG             | EVERDNLAEDIMRLREKLQEETLQREEAESTLQSFQDQVDNASLARLDLERKVESIQEEI        | 231 |
| sp P48671 VIM1_CARAU           | -----EVDRDNMGEDIERLREKLQDEMIQKEEAHNLQSFQDQVDNASLARLDLERKVESIQEEI    | 0   |
| tr A0A671V9L3 A0A671V9L3_SPAAU | EVYRDNLAEIDIRLREKLQDEIAQREDAESNMQSFQDQVDNAALARLDLERKVESIQDEI        | 219 |
| tr A0A411KAS9 A0A411KAS9_DICLA | -----EVYRDNLAEIDIRLREKLQDEIAQREDAESNMQSFQDQVDNAALARLDLERKVESIQDEI   | 22  |
| sp P48674 VIME_ONCMY           | IFLRKLHDEEVAELQAQIQ-DQHVQIDMDVAKPDLTAALRDVVRVQYETLASRNLQDSEDW       | 286 |
| sp P02543 VIME_PIG             | AFLKKLHDEEIQELQAQIQ-EQHVQIDMDVSKPDLTAALRDVRQQYESVAAKNLQEAEEW        | 290 |
| sp P48671 VIM1_CARAU           | -----IFLRKLHDEEVAELQAQIQ-DQHVQIDMDVAKPDLTAALRDVVRVQYETLASRNLQDSEDW  | 0   |
| tr A0A671V9L3 A0A671V9L3_SPAAU | NFLKKLHDEEMLELQSQMQQQQHVQVDMEMAKPDLTAALRDVRLQYENLASKNIHESSEW        | 279 |
| tr A0A411KAS9 A0A411KAS9_DICLA | NFLKKLHDEEMLELQSQMQQQQHVQVDMEMAKPDLTAALRDVRLQYENLASKNIHESSEW        | 82  |
| sp P48674 VIME_ONCMY           | YKSKFADLSEAANRNTDAIRQAKQEANEYRRQVQALTCEVDLSKGTNESMERQMLEEES         | 346 |
| sp P02543 VIME_PIG             | YKSKFADLSEAANRNDALRQAKQESNEYRRQVQSLTCEVDALKGTNESLERQMRMEEN          | 350 |
| sp P48671 VIM1_CARAU           | -----DLTEAANKSNEALRLAKQESNDYRRQVQALTCEVDALKGTNESLERQMRMEEN          | 54  |
| tr A0A671V9L3 A0A671V9L3_SPAAU | YKSKFADLTEAAARNNDALRVAKQEANDYRRQVQALTCEVDALKGTNESLDRQMRMEEN         | 339 |
| tr A0A411KAS9 A0A411KAS9_DICLA | YKSKFADLTEAAARNNDALRVAKQEANDYRRQVQALTCEVDALKGTNESMERQIRELEEN        | 142 |
|                                | ***:*** :..*: * *****:*****:*****:*****:*****:***:***:***           |     |
| sp P48674 VIME_ONCMY           | FGCEANNFQDTISRLEDDIRNMKDEMARHLREYQDLLNVKMALDIEIATYRKLLGEESR         | 406 |
| sp P02543 VIME_PIG             | FAVEAANYQDTIGRLQDEIQNMKEEMARHLREYQDLLNVKMALDIEIATYRKLLGEESR         | 410 |
| sp P48671 VIM1_CARAU           | FAMESSSSQDKIVQLEEDTQNMKDEMAKHLHEYQDLLNVKMALDIEIATYRKLLGEESR         | 114 |
| tr A0A671V9L3 A0A671V9L3_SPAAU | FSLETGGYQDTIGRLEEDIHNMKDEMARHLREYQDLLNVKMALDIEIATYRKLLGEESR         | 399 |
| tr A0A411KAS9 A0A411KAS9_DICLA | FSLETGSYQDTIGHLEEDIH-----FSLETGSYQDTIGHLEEDIH-----                  | 162 |
|                                | *. *. . *. * :*: : :                                                |     |
| sp P48674 VIME_ONCMY           | ITTPMPNFSSFNLRRESMLEA-----RPMID-NLSKKVVIKTIETRD                     | 446 |
| sp P02543 VIME_PIG             | ISLPLPNFSSNLNRETNLDES-----LPLVDTHSKRTLLIKTVETRD                     | 451 |
| sp P48671 VIM1_CARAU           | ISTPLPNFSSFNLRRETMLLEL-----KPNIESTFTKKVLIKTIETRD                    | 155 |
| tr A0A671V9L3 A0A671V9L3_SPAAU | ITTPLASFSSNLNLRGRITSLHVDITNKLFLSFLETMMDSKPHIE-TTTKKVLIKTIETRD       | 458 |
| tr A0A411KAS9 A0A411KAS9_DICLA | -----ITTPMPNFSSFNLRRESMLEA-----RPMID-NLSKKVVIKTIETRD                | 162 |
| sp P48674 VIME_ONCMY           | GHVINESTQNHHDDLE                                                    | 461 |
| sp P02543 VIME_PIG             | GQVINETSQHHDHDDLE                                                   | 466 |
| sp P48671 VIM1_CARAU           | GQVLNQUESTQNHHDDLE                                                  | 170 |
| tr A0A671V9L3 A0A671V9L3_SPAAU | GQVINESTQNHHDDME                                                    | 473 |
| tr A0A411KAS9 A0A411KAS9_DICLA | -----GHVINESTQNHHDDLE                                               | 162 |

C. CLUSTAL O(1.2.4) multiple sequence alignment for S100-A1

|                                |                                                              |     |
|--------------------------------|--------------------------------------------------------------|-----|
| tr A0A6P6R5E7 A0A6P6R5E7_CARAU | -----                                                        | 0   |
| tr A0A671W834 A0A671W834_SPAAU | MAFSTLFALSLSLPLCAWVSLPLPLPSIFLGVAWLHYKYNNKLLGEPLHSSQITTKPQLL | 60  |
| tr C1BH93 C1BH93_ONCMY         | -----                                                        | 0   |
| sp P02639 S10A1_BOVIN          | -----                                                        | 0   |
| tr A0A8C4I043 A0A8C4I043_DICLA | -----                                                        | 0   |
|                                |                                                              |     |
| tr A0A6P6R5E7 A0A6P6R5E7_CARAU | -----MEGAIKTVVTQFL---SSARGKESLGGKNFQKLVSQSLGNILSDTD          | 43  |
| tr A0A671W834 A0A671W834_SPAAU | PLYVLHLLSAAMSELEVCMKELILLFHKYADEDGDKKHLKKEFKKLVE TELPTFLKTQK | 120 |
| tr C1BH93 C1BH93_ONCMY         | -----MPSDLERAMESMITVFHKYAAKEGSGNTLSRRELKDL MENELSGFLKSQK     | 50  |
| sp P02639 S10A1_BOVIN          | -----MGSELETAMETLINVFHAHSGKEGDKYKLSKKELKELLQTELSGFLDAQK      | 50  |
| tr A0A8C4I043 A0A8C4I043_DICLA | -----MPSQLEGAMDALITVFYNYSGNDGDKYKLNKGELKELLNSELTDFLT SQK     | 50  |
|                                | : * . : . : : * . . * . : : . * : * .                        |     |
|                                |                                                              |     |
| tr A0A6P6R5E7 A0A6P6R5E7_CARAU | SSSAVKDMMKGLDDNQDGKVGFEYLMVLVGYLANSLSEQKAQSSAAGGP            | 92  |
| tr A0A671W834 A0A671W834_SPAAU | NPKAVECIMKDLDTNKKDKLSFEEFLPLVAGLSMACDKCYNLQQKHCKK            | 169 |
| tr C1BH93 C1BH93_ONCMY         | DPATVDKIMKDLSNGGGEVNFEEFVSLVVGLSIACEQCYQMHHKKMKMGK           | 99  |
| sp P02639 S10A1_BOVIN          | DADAVDKVMKELDENGDEVDFFEYVVLVAALTVACNFFWENS-----              | 94  |
| tr A0A8C4I043 A0A8C4I043_DICLA | DPMLVEKIMNDLDSNKNDFNEFVVLVAALTVACNDFFEQKKKKNK-               | 98  |
|                                | . * . : * : * * * . : : . * : : * * * : : . .                |     |

|                                |                                                                                                                                              |     |
|--------------------------------|----------------------------------------------------------------------------------------------------------------------------------------------|-----|
| tr A0A671WZT8 A0A671WZT8_SPAAU | MSSSPERMSSSYRRHFEGNLAASSTYQLRVSSPSPARRESRPRSVSYYTRGGGTMVRRASSK                                                                               | 60  |
| sp Q28115 GFAP_BOVIN           | -MERRRVTSATR-----SYVSS---SEMVGGR-----R-----LGPG                                                                                              | 30  |
| tr A0A8C7NQ31 A0A8C7NQ31_ONCMY | -----RERGERKKARRHLYL--SGRAQTIPGTGPHRMTH-----SSTI                                                                                             | 36  |
| tr A0A8P4G1A2 A0A8P4G1A2_DICLA | -MEGQRYSYRKRYGPQGSSSTGVRIGSHSSSRSLSWHGTPRNLT-----SSPI                                                                                        | 49  |
| sp P48677 GFAP_CARAU           | -----                                                                                                                                        | 0   |
| <br>                           |                                                                                                                                              |     |
| tr A0A671WZT8 A0A671WZT8_SPAAU | AGLTSSSVSGT-LCLGLETKLDLDAAAAENRAFMTVTRSSSERQEMVVLNDRLAVYIEKVRS                                                                               | 119 |
| sp Q28115 GFAP_BOVIN           | TRLSLAR----MPPLPARVDVSLAGALNSGFKETRASERAEMMELNDRFASYIEKVRF                                                                                   | 85  |
| tr A0A8C7NQ31 A0A8C7NQ31_ONCMY | SRLSLGSAGGALLLTGPNRLDFSADSLKAQYRETRTNEKVEMMGLNDRFAFASIEKVRF                                                                                  | 96  |
| tr A0A8P4G1A2 A0A8P4G1A2_DICLA | SRLSLGSTNTALLGSPGDRLDFSADTLMAKYKETRTNEKMEMMGLNDRFASYIEKVRL                                                                                   | 10  |
| sp P48677 GFAP_CARAU           | -----REVDRVMLGNDRFASYIEKVRF<br>*   .:  ****:*  *****                                                                                         | 22  |
| <br>                           |                                                                                                                                              |     |
| tr A0A671WZT8 A0A671WZT8_SPAAU | LESKNKLLEAEIEALRSRYARPSGLRQLYESQLKDLHRVAEQMRVQRDTSLAAKEAMFGQ                                                                                 | 179 |
| sp Q28115 GFAP_BOVIN           | LEQQNKALAAEINQLRAK--EPTKLDAPVQAELRELRLRLDQLTANSARLEVERDNLAQD                                                                                 | 143 |
| tr A0A8C7NQ31 A0A8C7NQ31_ONCMY | LEQQNTVLVTETLQLRGK--EPSRLGDIQEELRELRLRQVDLSAGAKARLEIERDNMAAD                                                                                 | 154 |
| tr A0A8P4G1A2 A0A8P4G1A2_DICLA | LEQQNMKLVAELNLQKGK--EPSRLGDIQEELRELRLRQVDGLTAGAKARLEIERDNLASD                                                                                | 167 |
| sp P48677 GFAP_CARAU           | LEQQNKMLVAELNLQRGK--EPSRLGDIQEELRELRLRQVDGLNAGAKARLEIERDNLASD<br>**.*.  *  *:  *:.  *.  *  ::  *:*:*  :  .        :  :  :                    | 80  |
| <br>                           |                                                                                                                                              |     |
| tr A0A671WZT8 A0A671WZT8_SPAAU | LDSLKAKYEAAVVARKETEQDIEALRPQDVDRATSARIHLEKREHLEVELAFLRQHVKEE                                                                                 | 239 |
| sp Q28115 GFAP_BOVIN           | LGTLRQKLQDEANTQRLAEANNLAAAYRPQDEATLARLDLERKIESLEEIRFLRKIHEEE                                                                                 | 203 |
| tr A0A8C7NQ31 A0A8C7NQ31_ONCMY | VATLKQRLQDEMVLRLQDAESNLNAFRQDVDEASLNVRVQLERKIDALQDEIAFLKKIHEEE                                                                               | 214 |
| tr A0A8P4G1A2 A0A8P4G1A2_DICLA | VATLKQRLQEEMGLRQDAEGNLNAFRQDVDEASLNVRVQLERKIDALQDEINFLKKTTHDEE                                                                               | 227 |
| sp P48677 GFAP_CARAU           | LATLKQRLQEENALRQEAENNLTFRQDVDEAALNRVQLERKIDALQDESIFLRKHHEEE<br>:  *:  :  :      *  *:  :  :  *  :.*.*:  *:.***::  *:  *:  *:  *.*            | 140 |
| <br>                           |                                                                                                                                              |     |
| tr A0A671WZT8 A0A671WZT8_SPAAU | IEELMQQIYAAASKVDLTFLGPLDTALKQIQISQYDSIAAKNLKEMDAWYASKFQDLSSA                                                                                 | 299 |
| sp Q28115 GFAP_BOVIN           | VRELQEQLAQQQVHVEMDVAKPDLTAAALREIRTQYEAASSNNMHEAEWEYRSKFADLNDA                                                                                | 263 |
| tr A0A8C7NQ31 A0A8C7NQ31_ONCMY | LRELQEQLMAQQVHVDDVSKPDLTAALRDILRVQYEVSASSNIQETEWEYRSKFADLTDA                                                                                 | 274 |
| tr A0A8P4G1A2 A0A8P4G1A2_DICLA | LREFQEQLIMAAQQVHVDDLVS KPDLTAALRDILRVQYETMATSNMQETEWEYRSKFADLTDA                                                                             | 287 |
| sp P48677 GFAP_CARAU           | MRQLQEQLIAQQVHVDDLVS KPDLTTALKEIRAQFEAMATSNMQETEWEYRSKFADLTDA<br>:  :  :  *:          *:  :  ..  ***:***:*:  *::::*.*:*:  *  *  *  *.*       | 200 |
| <br>                           |                                                                                                                                              |     |
| tr A0A671WZT8 A0A671WZT8_SPAAU | STKHAQSVRTLREEIAGYRKNILDKERELDAVKTRNEYLVNQIRDTEVHKHKEEEDLQER                                                                                 | 359 |
| sp Q28115 GFAP_BOVIN           | AARNAELLRQAKHEANDYRRQLQALTCDLES LRGTNESLERQMREQEERHAREAASYQEA                                                                                | 323 |
| tr A0A8C7NQ31 A0A8C7NQ31_ONCMY | ATRNADALRLAKQEGNEYRRQLQAMTCDVLEARGTNESLEQQLRMEDRFVSBTAGYQDM                                                                                  | 334 |
| tr A0A8P4G1A2 A0A8P4G1A2_DICLA | ASRNAEALRQAKQANEYRRQIQVVTCDLEALRGTNESLERQLREMEDRFSDMTTG YQDT                                                                                 | 347 |
| sp P48677 GFAP_CARAU           | AGRNAEALRQAKQANEYRRQIQGLTCDLES LRGSNESLERQLREMEERFAIETAGYQDT<br>:  *:  *:  *  *.*  *.*  *  *  *  *  *  *  *  *  *  *  *  *  *  *  *  *  *  * | 260 |
| <br>                           |                                                                                                                                              |     |
| tr A0A671WZT8 A0A671WZT8_SPAAU | MEANKLDLKVTEKIALLLREHQDLLNVKMALEIEITTYRKLIEGEDSRLSTTVQNLSLT                                                                                  | 419 |
| sp Q28115 GFAP_BOVIN           | LARLEEEGQSLLKEDIAMRHLEQYQDLLNVKLALDIEIATYRKLLEGESNRITVPVQTFNSL                                                                               | 383 |
| tr A0A8C7NQ31 A0A8C7NQ31_ONCMY | VGHLEEEIQLKEGMARHLQEYQDLLNVKLALDIEIATYRKLLEGESNRITVPVMSQFSNL                                                                                 | 394 |
| tr A0A8P4G1A2 A0A8P4G1A2_DICLA | VSHLEEEIQLKEGMARHLQEYQDLLNVKLALDIEIATYRKLLEGESNRITVETECFPLS                                                                                  | 407 |
| sp P48677 GFAP_CARAU           | VARLEDEIQMLKEEMARHLQEYQDLLNVKLALDIEIATYRKLLEGESNRITVPVNFTNL<br>:  :  :  :  *:  *  *.*:*****.*.*.*.*.*.*.*.*.*.*:  :  :                       | 320 |
| <br>                           |                                                                                                                                              |     |
| tr A0A671WZT8 A0A671WZT8_SPAAU | GGLQLTTSVSLCAASASDSSATAALKLNEARDESTISRAEAASEEQSIEMSEKTVLIIR                                                                                  | 479 |
| sp Q28115 GFAP_BOVIN           | QIRET-SLD-TKSVS-----EG-----HLKRNIIVK                                                                                                         | 407 |
| tr A0A8C7NQ31 A0A8C7NQ31_ONCMY | QIRET-SMD-TKFS-----EA-----HVKRSIIVR                                                                                                          | 418 |
| tr A0A8P4G1A2 A0A8P4G1A2_DICLA | PSTHPSETNL-DTKTP-----EA-----HVKRSILVR                                                                                                        | 433 |
| sp P48677 GFAP_CARAU           | QPRDT-SLD-TKLT-----EA-----HVKRSIIVR<br>.  :                              .                                                                   | 344 |
| <br>                           |                                                                                                                                              |     |
| tr A0A671WZT8 A0A671WZT8_SPAAU | TVKTDDEDKYES--DTQTRTIISGAADDTTEE                                                                                                             | 509 |
| sp Q28115 GFAP_BOVIN           | TVEMRDGEVIKESKQEHKDVD-                                                                                                                       | 428 |
| tr A0A8C7NQ31 A0A8C7NQ31_ONCMY | TVETRDGEVCRTS-----                                                                                                                           | 431 |
| tr A0A8P4G1A2 A0A8P4G1A2_DICLA | TVETRDGEIIKESTTEHKDLP-----                                                                                                                   | 454 |
| sp P48677 GFAP_CARAU           | TVETRDGEIIKESTTERKDLP-----                                                                                                                   | 365 |

$$\begin{array}{ccccccc} \star & \star & : & & : & & : \\ & & : & & : & . & : \\ & & & & & & \end{array}$$

E. CLUSTAL O(1.2.4) multiple sequence alignment for desmin.

```

tr|A0A6P6PJ00|A0A6P6PJ00_CARAU      ----- 0
sp|P17661|DESM_HUMAN                MSQAY-SSSQRVSSYRRTFGGAPGFPLGSPVFPFRAGFGSKGSSSVTSRVYQVSRT 59
tr|A0A8C4I534|A0A8C4I534_DICLA      -MASYSSSAQSASSYRRHFGHGTYS---PSLN-----RSLVYEVTRS 39
tr|Q8UWF1|Q8UWF1_ONCMY              -----ISSYRRTFGSGIGST---PGMSSMFSGHGGSS-GSAHMSRVYEMTKS 45
tr|A0A2R2YUL3|A0A2R2YUL3_SPAAU      MSKSYSSSAQSASSYRRTFGSGVGST---PMSSYYSSGAGGRSS-SSASMSRVYEVKS- 55

tr|A0A6P6PJ00|A0A6P6PJ00_CARAU      MRAHWQCGN-----ATAGSRDKAHY-----SHF-CERT-DRAHDAH 35
sp|P17661|DESM_HUMAN                SGGAGG-LGSLRAS----RLGTTTRTPSSYGAGELLDFSLADAVNQEFLLTRTNEKVELQE 114
tr|A0A8C4I534|A0A8C4I534_DICLA      SATPTYRVSSGGYKGPLAASRASVGRSYAGMGETLDFSLADALNQEFLLTRTNEKVELQH 99
tr|Q8UWF1|Q8UWF1_ONCMY              SARPSYSSGSIRSSS-GGAM-----RSYAGMGKELDFNLADATNRDFLDTRTNEKAELOH 99
tr|A0A2R2YUL3|A0A2R2YUL3_SPAAU      SSLPSYSSYRVSSGA-GGAGYGASTAIRTYSGEKLDNFLADAMNQDFLNTRTNEKAELOH 114
                                     :  .:      . *  ** :... .

tr|A0A6P6PJ00|A0A6P6PJ00_CARAU      TVFSYSPVATKVRSLQKNKLEIEALKNRYLKPTGLRLLYEEQLQELKRLAEQMRIQ 95
sp|P17661|DESM_HUMAN                LNDRFANYIEKVRFLQQAALAAEVNRLKGRE--PTRVAELYEEELRELRRQVEVLTNQ 172
tr|A0A8C4I534|A0A8C4I534_DICLA      LNDRFASYIEKVRFLQQNQVLAVEVERLRGRE--PTRIADLYEEEMSELRRQVEILTNQ 157
tr|Q8UWF1|Q8UWF1_ONCMY              LNDRFASYIEKVRFLQQNATLVVEIERLRGHE--PTRVAEMYEEEMRELRRQVQDMSND 157
tr|A0A2R2YUL3|A0A2R2YUL3_SPAAU      LNDRFASYIEKVRFLQQAALTVEIEKLRGRE-GPGRVAEMYEEEMRELRRQIESHSNQ 173
                                     : :  *** ***** * .*: *: :  * :  :****: **: * :

tr|A0A6P6PJ00|A0A6P6PJ00_CARAU      RDLAIAAKDAMAGQLEMIVKYEEAVEMRKKAEIDIEAFRPDVAATAARIALAKQLENL 155
sp|P17661|DESM_HUMAN                RARVDVERDNLDDDLQRLKAKLQEEIQLKEEAENNLAAFRADVDAATLARIDLERRIESL 232
tr|A0A8C4I534|A0A8C4I534_DICLA      RSRVEVERDNLADDLQKLRLQEEILQKEDAENNLAAFRADVDAATLARLDLERRIETL 217
tr|Q8UWF1|Q8UWF1_ONCMY              RARMEVERDNLADDLQKLRLQEVHQRREEAENNLAFRADVDSATLARLDLERRIESL 217
tr|A0A2R2YUL3|A0A2R2YUL3_SPAAU      RARVEVERDNLADDLQKLRLQEEIHQKEEAENNLAFRADVDNATLARLDLERRIESL 233
*      . *: : .*: : * : * : : :.* : : *** ** * *: * : :.*

tr|A0A6P6PJ00|A0A6P6PJ00_CARAU      EVELEFLRRVHKEIEBELMKQIYAAHATAADAYSLPDLSSAIKQIQLYDDIAAKNLQEM 215
sp|P17661|DESM_HUMAN                NEEIAFLKKVHEEEIRELQAQLQEQQVQVEMDMSPDLTAALRDIRAQYETIAAKNISEA 292
tr|A0A8C4I534|A0A8C4I534_DICLA      QEEIAFLKKIHEEEIRELQSQMQETQVQIQMDMSKPDLTAAALRDIRAQYEGIAAKNIAEA 277
tr|Q8UWF1|Q8UWF1_ONCMY              QEEITFLKKIHEEEIHELTSQMQETSQVQVQMDMSKPDLTVALRDIRMQYEGIAAKNISEA 277
tr|A0A2R2YUL3|A0A2R2YUL3_SPAAU      QEEIGFLKKIHEEEIRELQSQMQESQVQIQMDMSKPDLTAAALRDIRMQYEGIAAKNISEA 293
: *: *: : : :*.** *:      .      * *: : *: : :*: *: *: *: *

tr|A0A6P6PJ00|A0A6P6PJ00_CARAU      DSWYKSKFDDLNKSSKHVDKVRSVREEIVTAKKDIQNKERDLDLSLKTNEALEAQIRET 275
sp|P17661|DESM_HUMAN                EEWYKSKVSDLTQAANKNDALRQAKQEMMEYRHQIQSYTCEIDALKGTNDSLMRQMREL 352
tr|A0A8C4I534|A0A8C4I534_DICLA      EDWYKSKVSDLNQAVSKNNEALKQARQETMEFRHQIQSYTCEIDSLKGTNESLMRQMMDM 337
tr|Q8UWF1|Q8UWF1_ONCMY              EDWYKSKVSDLNQAVNKNNDALRQAKQESMEFRHQIQSYTCEIDSLKGTNESLLRQMREM 337
tr|A0A2R2YUL3|A0A2R2YUL3_SPAAU      EEWYKSKVSDLNQAVNKNNDALRQAKQESMEYRHQIQSYTCEIDSLKGTNESLLRQMREM 353
:.*****.:.*: : : : :*: : : :*.** :*:** .*: * *: :

tr|A0A6P6PJ00|A0A6P6PJ00_CARAU      QEKYRKELEELQARIEALQLELKSSKQRTAMLLREYQDLLNVKMALEIEITTYRKLIEGE 335
sp|P17661|DESM_HUMAN                EDRFASEASGYQDNARLEEEIRHLKDEMARHLREYQDLLNVKMALEDVEIATYRKLIEGE 412
tr|A0A8C4I534|A0A8C4I534_DICLA      EDRHGVEAGRFQDNARLEAEIANMKDEMARHLREYQDLLNVKMALEDVEIATYRKLIEGE 397
tr|Q8UWF1|Q8UWF1_ONCMY              EDRLGNEAGGYQDSVTRLEAEIAKMKDEMARHLREYQDLLNVKMALEDIEIATYRKLIEGE 397
tr|A0A2R2YUL3|A0A2R2YUL3_SPAAU      EDRMGREASGFQDTIARLEADIAMKDDMARHLREYQDLLNVKMALEDIEIATYRKLIEGE 413
: :  *      * :  * : : :  * :  * *****: :*:*****:***

tr|A0A6P6PJ00|A0A6P6PJ00_CARAU      DSRITSVMQSMQTMSLMSGISVHSAGAAGVAGIVDKVGGGPDGGAASGLGGNGGGLLN 395
sp|P17661|DESM_HUMAN                ESRINLP-----I----- 420
tr|A0A8C4I534|A0A8C4I534_DICLA      ESRITLP-----V----- 405
tr|Q8UWF1|Q8UWF1_ONCMY              ESRITVSGSKSSH---SGSHSA-----A----- 417
tr|A0A2R2YUL3|A0A2R2YUL3_SPAAU      ESRITTTAP-----V-----Q----- 424
:***.

tr|A0A6P6PJ00|A0A6P6PJ00_CARAU      GITSGVGPGTTVDYTQEQAVEKTERKTVLIRTVKTEDDTLESNTQESYSISGAADDEE 455
sp|P17661|DESM_HUMAN                QTYNALNFRETSP---QRGSEVHTKKTVMIKTIETRDGEVVSEATQQQHEVL----- 470
tr|A0A8C4I534|A0A8C4I534_DICLA      QSYSTLSFRETSPEHQ-QRASEMHSKKTVLIKTIETRDGEVVSESTQHQQDIM----- 457
tr|Q8UWF1|Q8UWF1_ONCMY              SLYSTVGFRETSQPDV--GRSAEVHKKTVLIKTIETRDGEVVSE----- 459
tr|A0A2R2YUL3|A0A2R2YUL3_SPAAU      SAYSSIGFRETSPEHQRSSEVHKKTVLIKTIETRDGEVVSESTQHQQDIM----- 477
* ..      *: :      . *      :***:*.*:*.*. : *:

```
